# Supplementary material for: Is vertebral shape variability in caecilians (Amphibia: Gymnophiona) constrained by forces experienced during burrowing?
Source: Oxford University Press journal article supplement (doi:10.1242/jeb.244288), 2022-06-06
Supplement: jeb244288supp.pdf [file jeb244288supp.pdf]

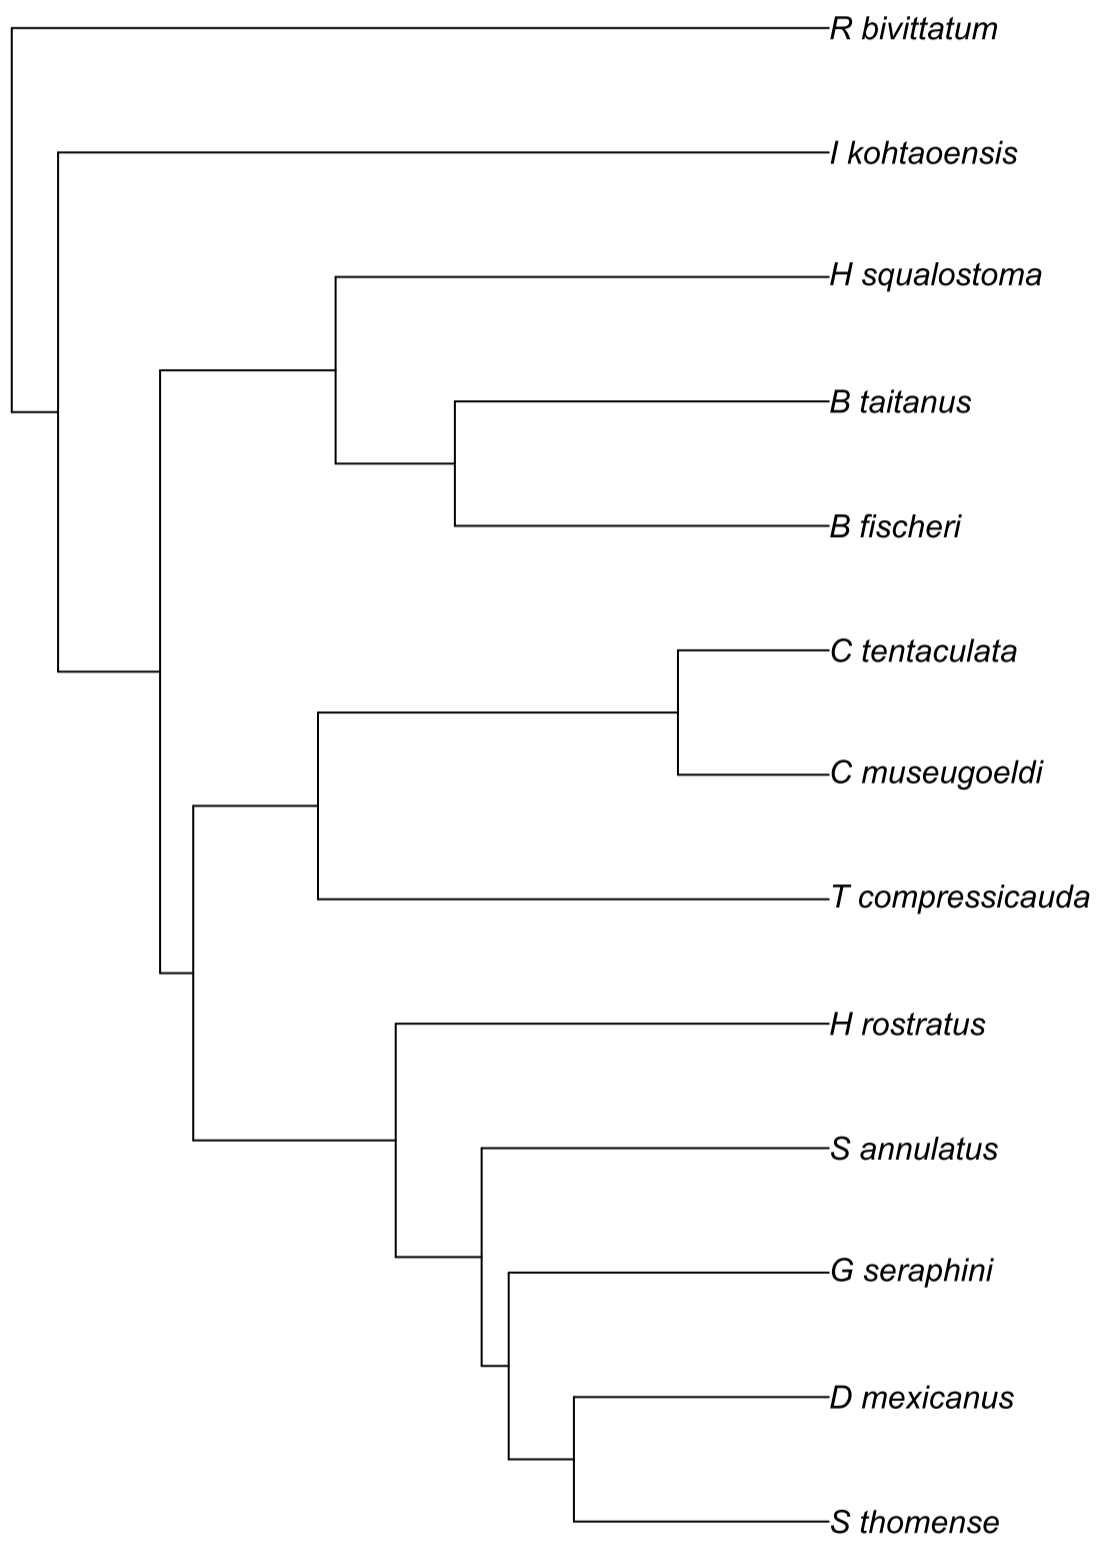

**Fig. S1.** Maximum credibility tree used in our analyses

**Table S1.** Details of the specimens/scans used in the study.

| Family         | Species                                         | ID                                          | Origin | Voxel size ( $\mu\text{m}$ ) |
|----------------|-------------------------------------------------|---------------------------------------------|--------|------------------------------|
| Rhinatremaidae | <i>Rhinatrema bivittatum</i> <sup>†</sup>       | Rhinatrema bivittatum byu:main:48675        | MS     | 12.81                        |
|                | <i>Rhinatrema bivittatum</i> <sup>*</sup>       | Rhinatrema bivittatum A53                   | AH     | 31.72                        |
|                | <i>Rhinatrema bivittatum</i> <sup>*†</sup>      | Rhinatrema bivittatum AL8                   | AH     | 31.72                        |
|                | <i>Rhinatrema bivittatum</i> <sup>*</sup>       | Rhinatrema bivittatum B75                   | AH     | 33.07                        |
|                | <i>Rhinatrema bivittatum</i> <sup>*</sup>       | Rhinatrema bivittatum B80                   | AH     | 28.34                        |
| Ichthyophiidae | <i>Ichthyophis kohtaoensis</i>                  | Ichthyophis kohtaoensis ncsm:herp:7920      | MS     | 18.01                        |
|                | <i>Ichthyophis kohtaoensis</i> <sup>†</sup>     | Ichthyophis kohtaoensis ZMH A08981          | ZMH    | 6.83                         |
|                | <i>Ichthyophis kohtaoensis</i> <sup>*</sup>     | Ichthyophis kohtaoensis 218831              | UMMZ   | 31.72                        |
|                | <i>Ichthyophis kohtaoensis</i> <sup>*</sup>     | Ichthyophis kohtaoensis 218832              | UMMZ   | 31.72                        |
| Herpelidae     | <i>Boulengerula fischeri</i> <sup>*</sup>       | Boulengerula fischeri 3                     | AH     | 32.48                        |
|                | <i>Boulengerula fischeri</i> <sup>*</sup>       | Boulengerula fischeri 4                     | AH     | 32.48                        |
|                | <i>Boulengerula fischeri</i> <sup>*</sup>       | Boulengerula fischeri 5                     | AH     | 32.48                        |
|                | <i>Boulengerula fischeri</i> <sup>*</sup>       | Boulengerula fischeri 7                     | AH     | 32.48                        |
|                | <i>Boulengerula fischeri</i> <sup>*†</sup>      | Boulengerula fischeri AH1                   | AH     | 9.74                         |
|                | <i>Boulengerula taitanus</i> <sup>*†</sup>      | Boulengerula taitanus AH2                   | AH     | 16.07                        |
|                | <i>Boulengerula taitanus</i> <sup>*</sup>       | Boulengerula taitanus AL010401              | AH     | 31.72                        |
|                | <i>Boulengerula taitanus</i> <sup>*†</sup>      | Boulengerula taitanus AL010402              | AH     | 9.74                         |
|                | <i>Boulengerula taitanus</i> <sup>*</sup>       | Boulengerula taitanus JM01452               | AH     | 33.07                        |
|                | <i>Boulengerula taitanus</i> <sup>*</sup>       | Boulengerula taitanus JM01584               | AH     | 33.07                        |
|                | <i>Herpele squalostoma</i> <sup>*</sup>         | Herpele squalostoma AL10                    | AH     | 34.37                        |
|                | <i>Herpele squalostoma</i> <sup>*</sup>         | Herpele squalostoma AL2                     | AH     | 31.72                        |
|                | <i>Herpele squalostoma</i> <sup>*</sup>         | Herpele squalostoma AL30                    | AH     | 31.72                        |
|                | <i>Herpele squalostoma</i> <sup>*</sup>         | Herpele squalostoma AL31                    | AH     | 34.35                        |
|                | <i>Herpele squalostoma</i> <sup>*</sup>         | Herpele squalostoma AL32                    | AH     | 32.48                        |
| Caeciliidae    | <i>Caecilia museugoeldi</i> <sup>*</sup>        | Caecilia museugoeldi V2101                  | NHM    | 63.47                        |
|                | <i>Caecilia tentaculata</i> <sup>*</sup>        | Caecilia tentaculata 3955                   | NHM    | 90.83                        |
|                | <i>Caecilia tentaculata</i>                     | Caecilia tentaculata ku:kuh:175441          | MS     | 77.33                        |
| Typhlonectidae | <i>Typhlonectes compressicauda</i> <sup>†</sup> | Typhlonectes compressicauda 11307           | NHM    | 8.4                          |
|                | <i>Typhlonectes compressicauda</i>              | Typhlonectes compressicauda cas:herp:125431 | MS     | 36.87                        |
|                | <i>Typhlonectes compressicauda</i> <sup>*</sup> | Typhlonectes compressicauda AL20            | AH     | 17.65                        |
|                | <i>Typhlonectes compressicauda</i> <sup>*</sup> | Typhlonectes compressicauda AL6             | AH     | 49.37                        |

|                |                                       |                                     |       |       |
|----------------|---------------------------------------|-------------------------------------|-------|-------|
| Indotyphliidae | <i>Typhlonectes compressicauda</i> *† | Typhlonectes compressicauda AL7     | AH    | 46.81 |
|                | <i>Hypogeophis rostratus</i>          | Hypogeophis rostratus 73_38_B_101   | RMCA  | 20.99 |
|                | <i>Hypogeophis rostratus</i>          | Hypogeophis rostratus 73_38_B_110   | RMCA  | 20.99 |
|                | <i>Hypogeophis rostratus</i>          | Hypogeophis rostratus 73_38_B_111   | RMCA  | 25.94 |
|                | <i>Hypogeophis rostratus</i> †        | Hypogeophis rostratus 73_48_B_1     | RMCA  | 19.01 |
| Siphonopidae   | <i>Siphonops annulatus</i>            | Siphonops annulatus cas:herp:74304  | MS    | 22.17 |
|                | <i>Siphonops annulatus</i> †          | Siphonops annulatus 1924_9_20_9_Red | NHM   | 9.82  |
|                | <i>Siphonops annulatus</i> †          | Siphonops annulatus ZMH A00235      | ZMH   | 9.2   |
| Dermophiidae   | <i>Dermophis mexicanus</i>            | Dermophis mexicanus cas:herp:144523 | MS    | 50.79 |
|                | <i>Dermophis mexicanus</i> *          | Dermophis mexicanus A-52188         | UTACV | 56.04 |
|                | <i>Dermophis mexicanus</i> *          | Dermophis mexicanus AL2101201       | AL    | 88.52 |
|                | <i>Dermophis mexicanus</i> *          | Dermophis mexicanus AL2101202       | AL    | 93.79 |
|                | <i>Geotrypetes seraphini</i> *†       | Geotrypetes seraphini AL29041901    | AL    | 49.37 |
|                | <i>Geotrypetes seraphini</i> *        | Geotrypetes seraphini 2             | AH    | 49.37 |
|                | <i>Geotrypetes seraphini</i> *†       | Geotrypetes seraphini 6             | AH    | 15.17 |
|                | <i>Geotrypetes seraphini</i> *        | Geotrypetes seraphini AL1           | AH    | 16    |
|                | <i>Geotrypetes seraphini</i> *        | Geotrypetes seraphini AL21          | AH    | 56.62 |
|                | <i>Geotrypetes seraphini</i> *        | Geotrypetes seraphini AL5           | AH    | 35.94 |
|                | <i>Schistometopum thomense</i> *      | Schistometopum thomense 6           | AH    | 32.48 |
|                | <i>Schistometopum thomense</i> *      | Schistometopum thomense 7           | AH    | 32.48 |
|                | <i>Schistometopum thomense</i> *      | Schistometopum thomense #8          | AH    | 32.48 |
|                | <i>Schistometopum thomense</i> *      | Schistometopum thomense AL11        | AH    | 32.48 |

\*Specimens scanned using the HECTOR micro computed tomography ( $\mu$ CT) scanner

†Specimens for which only the atlas was available

Abbreviations are as follows:

- Personal collection of Anthony Herrel (AH)
- Personal collection of Aurélien Lowie (AL)
- Morphosource.org (MS)
- Natural History Museum, London (NHM)
- Royal Museum of Central Africa (RMCA)
- Staatliches Museum für Naturkunde Stuttgart (SMNS)
- University of Michigan, Museum of Zoology (UMMZ)
- University of Texas Arlington, Amphibian & Reptile Diversity Research Center (UTACV)
- Zoological Museum, Hamburg (ZMH)

**Table S2. Body width, push force and supposed ecology of the skinks, snakes and caecilians used in this study.**

|                            | Species                            | Body width (mm) | Push force (N)        | Ecology               |
|----------------------------|------------------------------------|-----------------|-----------------------|-----------------------|
| Skinks                     | <i>Acontias kgalagadi</i>          | 4.28            | 0.56                  | Active burrower       |
|                            | <i>Acontias litoralis</i>          | 3.38            | 0.51                  | Active burrower       |
|                            | <i>Acontias meleagris</i>          | 7.26            | 3.13                  | Active burrower       |
|                            | <i>Acontias percivali</i>          | 9.28            | 5.32                  | Active burrower       |
|                            | <i>Chalcides ocellatus</i>         | 10.77           | 4.56                  | leaf litter           |
|                            | <i>Chalcides sepsoides</i>         | 7.45            | 2.46                  | sand swimmer          |
|                            | <i>Mochlus sundevallii</i>         | 6.97            | 1.56                  | leaf litter           |
|                            | <i>Pygomeles braconnieri</i>       | 7.99            | 7.5                   | sand swimmer          |
|                            | <i>Scelotes bipes</i>              | 3.84            | 0.36                  | Active burrower       |
|                            | <i>Scelotes montispectus</i>       | 3.55            | 0.55                  | Active burrower       |
|                            | <i>Scincus scincus</i>             | 14.76           | 7.72                  | sand swimmer          |
|                            | <i>Typhlosaurus caecus</i>         | 4.27            | 2.11                  | Active burrower       |
|                            | <i>Typhlosaurus lomiae</i>         | 2.91            | 0.32                  | Active burrower       |
| <i>Typhlosaurus vermis</i> | 3.56                               | 1.58            | Active burrower       |                       |
| Snakes                     | <i>Anilius scytale</i>             | 8.8             | 5.9                   | leaf litter           |
|                            | <i>Aparallactus guentheri</i>      | 6               | 1.6                   | leaf litter           |
|                            | <i>Eryx colubrinus</i>             | 16              | 2.8                   | Active burrower       |
|                            | <i>Farancia abacura</i>            | 16.8            | 11.8                  | Active burrower       |
|                            | <i>Loxocemus bicolor</i>           | 19.9            | 14.1                  | Active burrower       |
|                            | <i>Oxyrhopus melanogerys</i>       | 10.3            | 2.9                   | leaf litter           |
|                            | <i>Afrotyphlos angolensis</i>      | 15.4            | 18.2                  | Active burrower       |
|                            | <i>Rhinothyphlos lalandei</i>      | 6.1             | 3.3                   | Active burrower       |
|                            | <i>Rhinotyphlops unitaeniatus</i>  | 6.7             | 8.1                   | Active burrower       |
|                            | <i>Leptotyphlops scutifrons</i>    | 3.1             | 0.4                   | Active burrower       |
|                            | <i>Myriopholis algeriensis</i>     | 1.2             | 0.2                   | uses existing burrows |
| <i>Liotyphlops beui</i>    | 4                                  | 1.5             | uses existing burrows |                       |
| Caecilians                 | <i>Boulengerula fischeri</i>       | 3.02            | 0.53                  | Active burrower       |
|                            | <i>Boulengerula taitanus</i>       | 5.04            | 2.56                  | Active burrower       |
|                            | <i>Caecilia musegoeldi</i>         | 10.24           | 3.23                  | Active burrower       |
|                            | <i>Caecilia tentaculata</i>        | 19.84           | 3.88                  | Active burrower       |
|                            | <i>Dermophis mexicanus</i>         | 18.85           | 16.11                 | Active burrower       |
|                            | <i>Geotrypetes seraphini</i>       | 7.43            | 2.03                  | Active burrower       |
|                            | <i>Herpele squalostoma</i>         | 6.6             | 1.77                  | Active burrower       |
|                            | <i>Hypogeophis rostratus</i>       | 9.5             | 4.15                  | Active burrower       |
|                            | <i>Ichthyophis kohtaoensis</i>     | 7.15            | 4.8                   | leaf litter           |
|                            | <i>Rhinatrema bivittatum</i>       | 7.37            | 0.89                  | leaf litter           |
|                            | <i>Schistometopum thomense</i>     | 6.47            | 1.37                  | leaf litter           |
|                            | <i>Siphonops annulatus</i>         | 15              | 6.43                  | Active burrower       |
|                            | <i>Typhlonectes compressicauda</i> | 12.28           | 1.19                  | Aquatic               |

Data were extracted from Herrel *et al.* (2021) for snakes, Le Guilloux *et al.* (2021) for skinks and this paper for caecilians.
